# Supplementary material for: Kinetics of electrocatalytic reduction of oxygen and hydrogen peroxide on dispersed gold nanoparticles
Source: Royal Society of Chemistry journal article supplement (doi:10.1039/c002416c), 2010-01-01
Supplement: c002416c.pdf [file c002416c.pdf]

## Supplementary Information

Table SI 1 Details of the amount of materials used for the synthesis of the different electrocatalysts

| Material   | H <sub>2</sub> AuCl <sub>4</sub> ·3H <sub>2</sub> O /mg | PVA /mg | Volume /dm <sup>3</sup> | Carbon /mg |
|------------|---------------------------------------------------------|---------|-------------------------|------------|
| Au/C noPVA | 75                                                      | -       | 1.5                     | 150        |
| Au/C-50    | 100                                                     | 25.0    | 1                       | 200        |
| Au/C -35   | 70                                                      | 17.5    | 1                       | 140        |
| Au/C-25    | 75                                                      | 18.8    | 1.5                     | 150        |
| Au/C -15   | 45                                                      | 11.3    | 1.5                     | 90         |

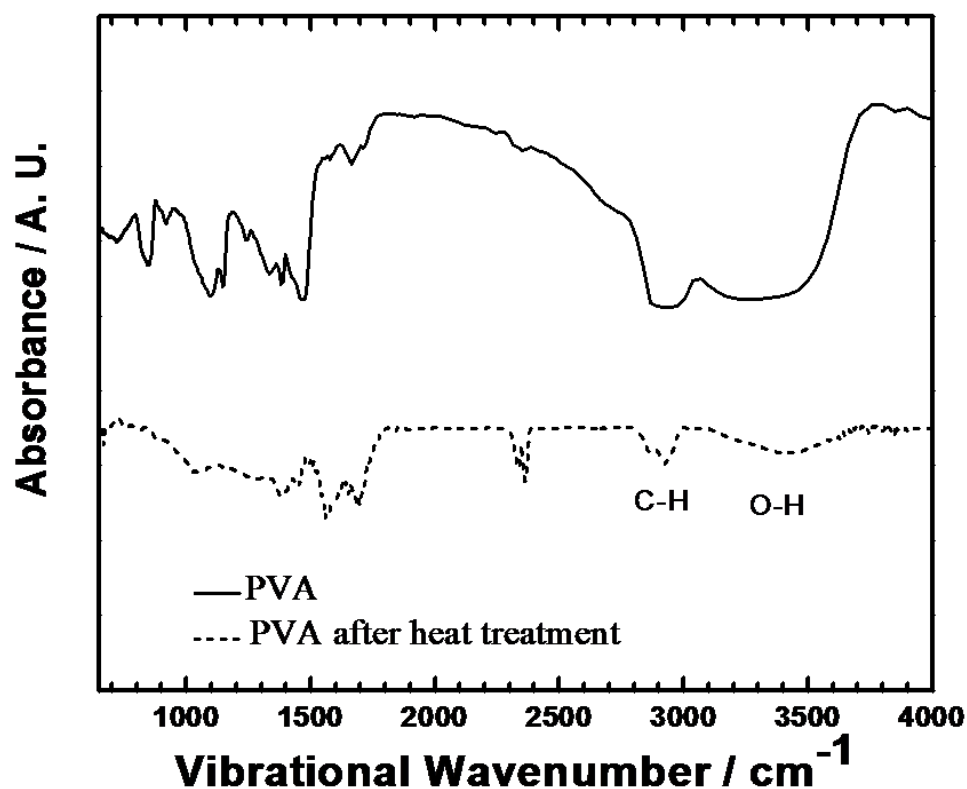

**Figure SI-1** FTIR spectra of PVA (solid line) and of the residue after PVA thermal decomposition (dashed line).

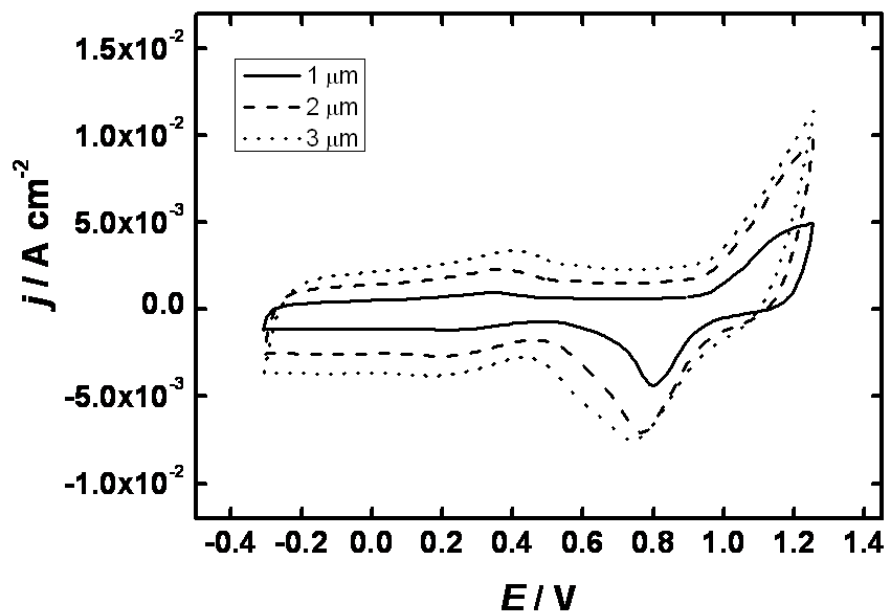

**Figure SI-2** Cyclic voltammograms for electrodes prepared with different amounts of Au/C-35 material in 0.1M HClO<sub>4</sub>. Sweep rate = 200mV/s.

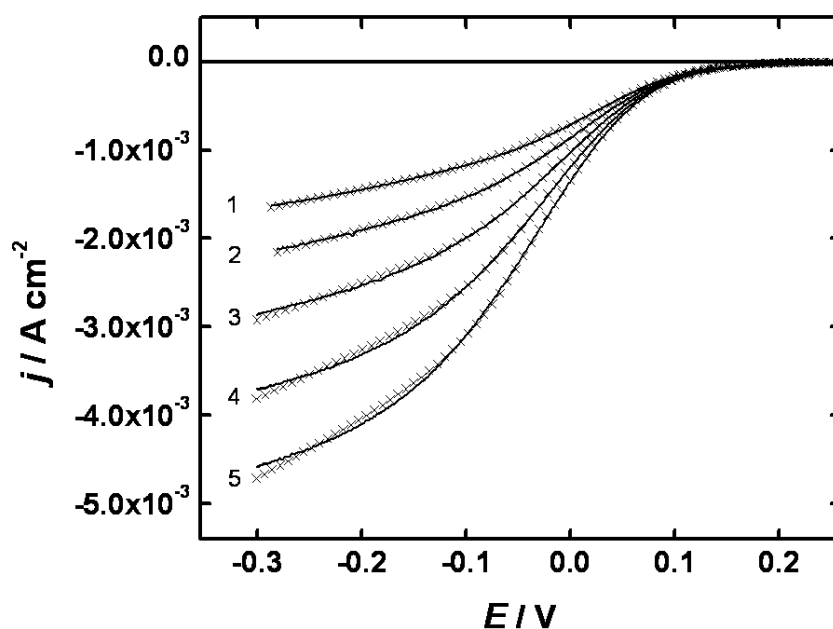

**Figure SI-3.** Polarization curves for the ORR for the Au/C-25 material at different rotation rates: 200 (1), 400 (2), 800 (3), 1500 (4) and 2500 RPM (5). The crosses are the results of the corresponding NLR fits.

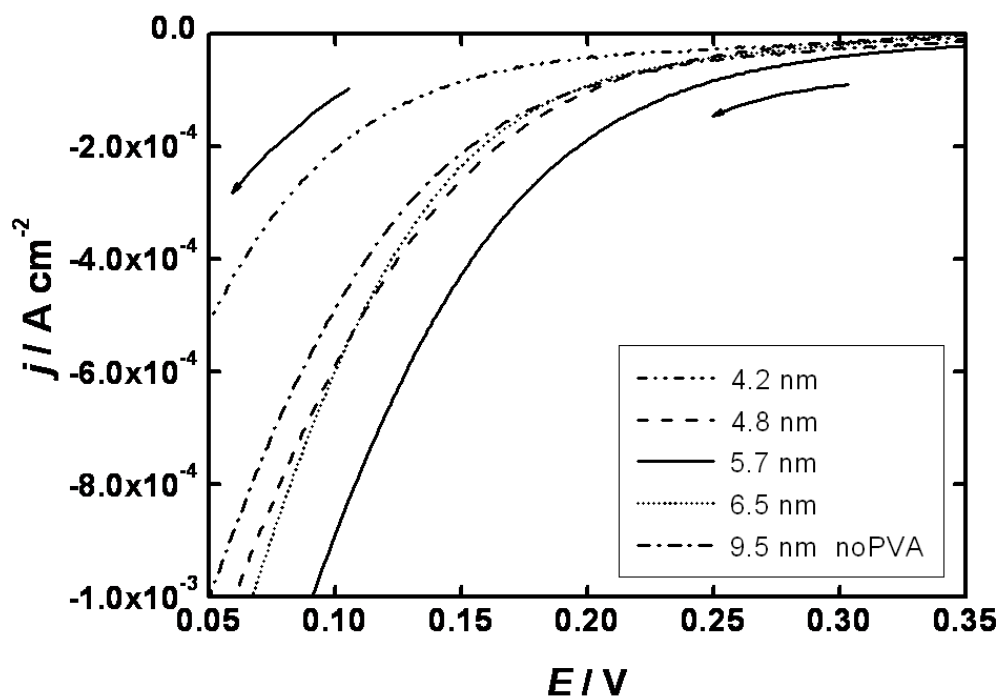

**Figure SI-4** Comparison of the polarization curves in the region of the onset of the ORR for carbon-supported nanoparticles of different sizes.

Table SI 2 Parameters employed in NLR for approximation of the dependence of  $n$  on  $E$ .

| Material   | a    | b   | $E$ at $n=2$<br>/ V |
|------------|------|-----|---------------------|
| Au/C noPVA | -2.1 | 2.5 | 0.23                |
| Au/C-50    | -3.4 | 2.3 | 0.09                |
| Au/C -35   | -3.3 | 2.1 | 0.03                |
| Au/C-25    | -4.3 | 1.9 | -0.02               |
| Au/C -15   | -3.3 | 1.9 | -0.03               |

### Specific surface area calculation

The surface area of gold was calculated assuming a cubo-octahedral geometry (truncated octahedron) for which the volume is:

$$V = 32r^3 \quad (\text{SI-1})$$

where  $r$  is a radius (half of the longest diagonal of the truncated octahedron).

The surface area is:

$$A = (12 + 24\sqrt{3})r^2 \quad (\text{SI-2})$$

The specific surface area of a gold particle with cubo-octahedral geometry with a radius  $r_i$  is then given by:

$$A_{r_i} = \frac{3.35}{r_i \rho} \quad (\text{SI-3})$$

where  $\rho$  is crystallographic density of gold (19.3 g cm<sup>-3</sup>).

For the sample of particles with sizes given by a probability density function  $f(r)$ , the total specific area is:

$$A_{\text{tot}} = \int_0^{r_{\text{max}}} \frac{3.35}{r\rho} f(r) dr \quad (\text{SI-4})$$

The probability density functions were obtained by fitting the histograms shown in Figure 3 to a normal distribution and by normalizing it. The probability density function for size distribution shown in Figure 2 was approximated by the raw data from the histogram (numerical integration where the bin size was the integration step). The total gold surface area per g of Au/C material,  $A_S$ , was then calculated from the Au/C weight ratio (Table 1).

### Derivation of equation (10)

From equations (8) and (9), the current is given by:

$$I_D = \frac{4FAk_2 c_{O_2}^b k_M(O_2)}{k_2 + k_M(O_2)} + \frac{I_R}{N} \quad (\text{SI-5})$$

Hence

$$k_2 I_D + k_M(O_2) I_D = \left( -4FAc_{O_2}^b k_M(O_2) + \frac{I_R}{N} \right) k_2 + \frac{I_R}{N} k_M(O_2) \quad (\text{SI-6})$$

From (SI-6), the rate constant  $k_2$  is:

$$k_2 = \frac{\left( \frac{I_R}{N} \right) k_M(O_2) - k_M(O_2) I_D}{I_D + 4FAc_{O_2}^b k_M(O_2) - \left( \frac{I_R}{N} \right)} \quad (\text{SI-7})$$

Dividing by the disc area, Equation (10) follows.
